# Supplementary material
Source: MDPI journal article supplement (https://www.mdpi.com/2306-5338/9/5/80)
Supplement: s1 [file s1]

# Supplementary Materials

**Table S1.** Distribution of irrigation and land use in Shell Creek.

| Land Use              | (%) | Irrigated | Dryland | Corn | Soybean |
|-----------------------|-----|-----------|---------|------|---------|
| Irrigated Corn        | 24  | x         |         | x    |         |
| Irrigated Soybeans    | 14  | x         |         |      | x       |
| Range, Pasture, Grass | 18  |           |         |      |         |
| Dryland Corn          | 25  |           | x       | x    |         |
| Dryland Soybeans      | 13  |           | x       |      | x       |
| Subtotal (%)          | 94  | 38        | 38      | 49   | 27      |

**Table S2.** Periods considered for trend analysis in summer (S) and winter (W) at precipitation stations near Shell Creek.

|   | Columbus  | Elgin     | Genoa     | Madison   | Oakdale   | Schuyler  | Elgin awdn | Monroe awdn |
|---|-----------|-----------|-----------|-----------|-----------|-----------|------------|-------------|
| W | 1910–2014 | 1912–2014 | 1910–2014 | 1910–2006 | 1910–2014 | 1910–2012 | 1988–2014  | 1997–2014   |
| S | 1910–2014 | 1912–2014 | 1910–2014 | 1910–2011 | 1910–2014 | 1910–2011 | 1988–2014  | 1996–2014   |

**Table S3.** Precipitation trend analysis in summer (S) and winter (W) at rain gage stations near Shell Creek.

|   | Variable | Columbus | Elgin   | Genoa  | Madison | Oakdale | Schuyler | Elgin awdn | Monroe awdn |
|---|----------|----------|---------|--------|---------|---------|----------|------------|-------------|
| W | H**      | 0        | 0       | 0      | 0       | 0       | 0        | 0          | 0           |
|   | p-value  | 0.627    | 0.064*  | 0.485  | 0.120   | 0.436   | 0.837    | 0.966      | 0.938       |
|   | slope    | 0.0016   | −0.0062 | 0.0025 | −0.006  | −0.0023 | −0.00053 | 0          | −0.002      |
| S | H**      | 0        | 0       | 0      | 0       | 0       | 0        | 0          | 0           |
|   | p-value  | 0.097*   | 0.096*  | 0.748  | 0.323   | 0.131   | 0.536    | 0.428      | 0.326       |
|   | slope    | 0.0059   | 0.0053  | 0.001  | 0.0034  | 0.005   | 0.0021   | 0.024      | 0.092       |

\* Denote statistically significant trend at 10% significance level (90% confidence interval). \*\* H=0 denotes no significant trend at 5% significance level.

**Table S4.** Performance of calibrated and validated models using rain gage and radar forcings.

|       | Calibration | Validation | Calibration | Validation |
|-------|-------------|------------|-------------|------------|
| NSE   | 0.58        | 0.92       | 0.60        | 0.92       |
| RSR   | 0.65        | 0.28       | 0.63        | 0.28       |
| PBIAS | 8.31        | 6.09       | 5.54        | 20.7       |

**Table S5.** Daily and monthly performances of the water quality model for Shell Creek.

| SWAT    | Output    | Target   | Iteration# | No.         | P ‡  | R ‡    | NSE† | NSE       | NSE      |
|---------|-----------|----------|------------|-------------|------|--------|------|-----------|----------|
|         | Time-Step | Variable |            | parameters§ |      |        | Flow | Sediments | Atrazine |
| Daily   | Flow      |          | S          | 31          | 0.94 | 0.79   | 0.29 | -         | -        |
|         |           |          | C          | 9           | 0.91 | 0.5    | 0.33 | -         | -        |
|         |           |          | V          | -           | -    | -      | 0.19 | -         | -        |
|         | Sediments |          | S          | 9           | 0.37 | 0.01   | 0.36 | 0.02      | -        |
|         |           |          | C          | 5           | 0.11 | 0.01   | 0.37 | 0.03      | -        |
|         |           |          | V          | -           | -    | -      | 0.43 | 0.01      | -        |
|         | Atrazine  |          | S          | 10          | 0.01 | 1365   | 0.37 | 0.03      | 0.23     |
|         |           |          | C          | 5           | 0.18 | 181.67 | 0.37 | 0.03      | 0.25     |
|         |           |          | V          | -           | -    | -      | 0.43 | 0.01      | −0.01    |
| Monthly | Flow      |          | S          | 31          | 0.94 | 1.91   | 0.63 | -         | -        |
|         |           |          | C          | 13          | 0.89 | 1.71   | 0.79 | -         | -        |
|         |           |          | V          | -           | -    | -      | 0.65 | -         | -        |
|         | Sediments |          | S          | 9           | 0.33 | 1.21   | 0.77 | 0.69      | -        |
|         |           |          | C          | 5           | 0.39 | 0.84   | 0.77 | 0.69      | -        |
|         |           |          | V          | -           | -    | -      | 0.69 | 0.47      | -        |

|          |   |    |      |        |      |      |       |
|----------|---|----|------|--------|------|------|-------|
| Atrazine | S | 10 | 0    | 117141 | 0.77 | 0.69 | -0.09 |
|          | C | 4  | 0.61 | 12.19  | 0.77 | 0.69 | -0.08 |
|          | V | -  | -    | -      | 0.69 | 0.47 | -0.05 |

<sup>#</sup> S: Sensitivity analysis and C: Calibration (1992-94) used a 2,000-runs iteration total, V: Validation (2008-09) used a 1-run with the best parameters from calibration. <sup>†</sup> Nash-Sutcliffe efficiency (NSE) coefficient. <sup>§</sup> Number of parameters allowed changing their values in a given iteration. <sup>‡</sup> P-factor: percentage of observations within 95PPU, and R-factor: mean thickness of 95PPU band divided by the standard deviation of observed data.

**Table S6.** SWAT parameter values for atrazine.

| Parameters description                                                 | Units          | Atrazine |
|------------------------------------------------------------------------|----------------|----------|
| Pesticide percolation coefficient                                      |                | 0.5      |
| Application efficiency                                                 | fraction       | 0.99     |
| Degradation half-life on the foliage                                   | days           | 5        |
| Degradation half-life in the soil                                      | days           | 61       |
| Soil adsorption coefficient normalized for soil organic carbon content | (mg/kg)/(mg/L) | 171      |
| Wash-off fraction                                                      | fraction       | 0.45     |
| Solubility of the chemical in water                                    | mg/L           | 33       |
| Amount of pesticide applied to HRU                                     | kg/ha          | 1        |
| Depth of pesticide incorporation in the soil                           | mm             | 0        |

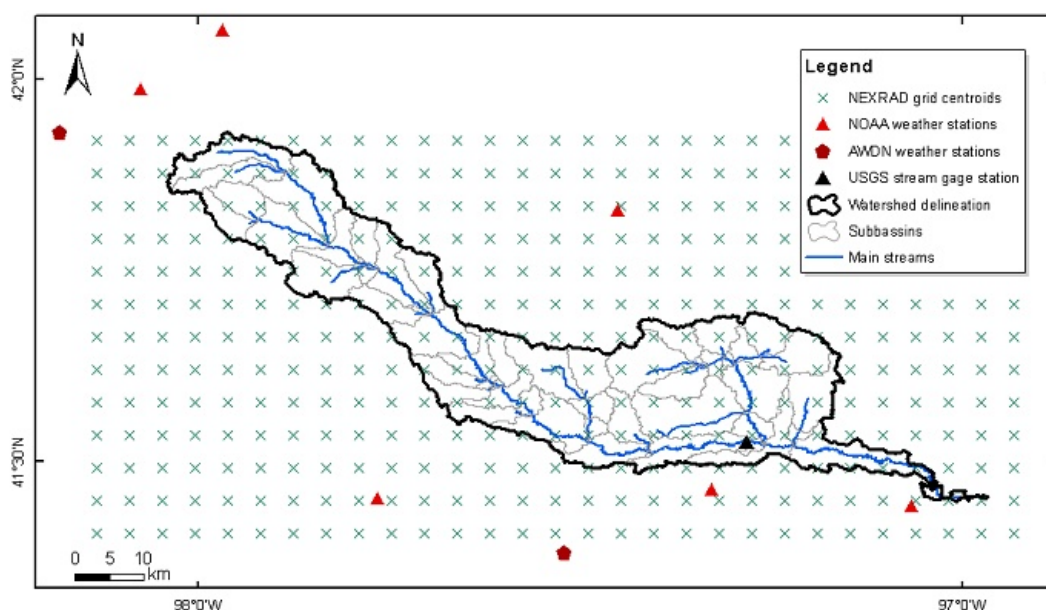

**Figure S1.** Rain gage stations and radar grid centroids used as forcings of the Shell Creek. model in SWAT

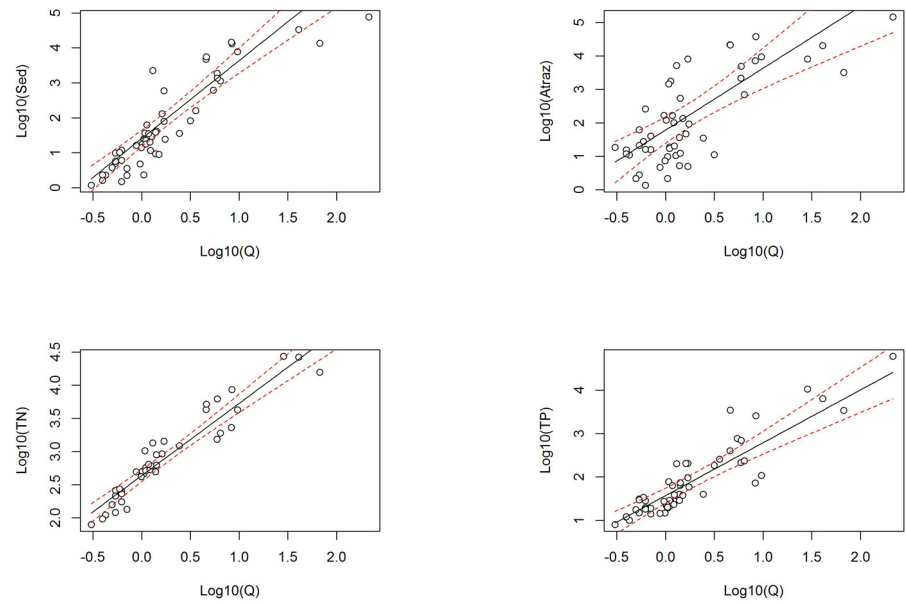

**Figure S2.** Logarithmic regression between sediments, nutrients, and atrazine, and streamflow in Shell Creek. The black line is the fitted regression. Red dashed lines display the 95% confidence band. Sed: sediments; Atraz: atrazine; TN: total nitrogen; TP: total phosphorus; Q: streamflow.
